# Supplementary material
Source: PubMed Central journal article supplement (PMC6842065)
Supplement: NIHMS1527571-supplement-Supplemental_Digital_Content_2.pdf [file NIHMS1527571-supplement-Supplemental_Digital_Content_2.pdf]

**Appendix 1. Prevalence Rates\* of Depressive Disorders Recorded per 1,000 Delivery Hospitalizations, by State and Year; National Inpatient Sample and State Inpatient Databases, Healthcare Cost and Utilization Project, 2000–2015†**

| State         | 00   | 01   | 02   | 03   | 04   | 05   | 06   | 07   | 08   | 09   | 10   | 11   | 12   | 13   | 14   | 15   | AARC‡ |
|---------------|------|------|------|------|------|------|------|------|------|------|------|------|------|------|------|------|-------|
| National      | 4.1  | 5.5  | 7.3  | 9.6  | 12.1 | 13.9 | 14.0 | 15.6 | 18.1 | 17.6 | 21.8 | 22.1 | 21.6 | 23.6 | 26.4 | 28.7 | 1.6¶  |
| Arizona       | 2.8  | 4.0  | 6.1  | 8.0  | 10.1 | 10.5 | 10.9 | 10.7 | 13.0 | 13.8 | 15.9 | 17.6 | 17.4 | 19.0 | 20.1 | 21.4 | 1.2¶  |
| Arkansas      | ---  | ---  | ---  | ---  | 5.5  | 8.4  | 11.5 | 10.3 | 9.6  | 13.7 | 13.7 | 13.9 | 15.1 | 18.3 | 20.3 | ---  | 1.2¶  |
| California    | 2.3  | 3.1  | ---  | 5.2  | 6.5  | 7.6  | 7.8  | 8.6  | 9.5  | 10.6 | 12.5 | 14.0 | ---  | ---  | ---  | ---  | 1.0¶  |
| Colorado      | 4.9  | 8.7  | 12.7 | 14.9 | 19.1 | 22   | 23.4 | 25.2 | 28.9 | 31.2 | 33.5 | 36.5 | 31.6 | 34.3 | 37.4 | 39.8 | 2.4¶  |
| D.C.          | ---  | ---  | ---  | ---  | ---  | ---  | ---  | ---  | ---  | ---  | ---  | ---  | ---  | 16.9 | 19.0 | ---  | ---§  |
| Florida       | 2.8  | 4.3  | 5.6  | 7.1  | 9.2  | 9.3  | 10.2 | 10.7 | 11.9 | 12.8 | 13.6 | 14.0 | 13.7 | 14.3 | 16.2 | ---  | 1.0¶  |
| Georgia       | ---  | ---  | ---  | ---  | ---  | ---  | ---  | ---  | ---  | ---  | ---  | ---  | 13.1 | 12.8 | 15.0 | ---  | 0.9   |
| Hawaii        | 2.5  | 3.7  | 3.6  | 6.0  | 6.1  | 6.0  | 7.6  | 5.2  | 7.8  | 9.0  | 9.3  | 11.8 | 9.5  | 12.7 | 12.6 | ---  | 0.7¶  |
| Iowa          | 5.2  | 5.5  | 8.8  | 12.4 | 17   | 17.1 | 17.5 | 21.3 | 21.4 | 24.1 | 25.8 | 30.8 | 29.1 | 33.1 | 34.1 | 36.8 | 2.2¶  |
| Kentucky      | 3.5  | 4.4  | 6.0  | 9.0  | 11.4 | 11.9 | 12.0 | 12.1 | 15.3 | 19.4 | 21.3 | 22.7 | 23.8 | 24.6 | 26.9 | 27.6 | 1.7¶  |
| Maine         | 15.2 | 20.7 | 27.8 | 41.3 | ---  | ---  | 42.4 | 50.7 | 53.9 | 59.0 | 55.9 | 53.4 | 56.6 | ---  | ---  | ---  | 3.8¶  |
| Maryland      | 5.6  | 9.0  | 13.2 | 15.5 | 21.5 | 24.2 | 28.2 | 30.5 | 31.5 | 33.4 | 37.5 | 38.9 | 39.7 | 41.4 | 45.4 | ---  | 2.9¶  |
| Massachusetts | 9.7  | 11.5 | 15.2 | 18.5 | 21.4 | 23.3 | 25.6 | 28.6 | 27.7 | 32.5 | 36.9 | 40.1 | 37.8 | 40.3 | ---  | ---  | 2.5¶  |
| Michigan      | 4.9  | 6.1  | 9.3  | 11.1 | 14.6 | 19.4 | 21.1 | 22.4 | 25.4 | 27.8 | 29.2 | 30.7 | 30.7 | 35.8 | 39.3 | ---  | 2.5¶  |
| Minnesota     | ---  | ---  | ---  | ---  | ---  | ---  | ---  | ---  | ---  | ---  | ---  | ---  | ---  | ---  | 51.1 | 53.8 | ---§  |
| Mississippi   | ---  | ---  | ---  | ---  | ---  | ---  | ---  | ---  | ---  | ---  | 8.9  | 9.0  | ---  | ---  | ---  | ---  | ---§  |
| Nebraska      | ---  | 6.3  | 9.6  | 14.2 | 14.2 | 13.5 | 14.8 | 17.2 | 21.9 | 23.0 | 24.0 | 26.0 | 22.5 | 28.7 | 29.9 | 33.8 | 1.7¶  |
| Nevada        | ---  | ---  | 2.3  | 3.7  | 5.0  | 4.9  | 5.6  | 5.8  | 6.4  | 7.1  | 7.7  | 9.1  | 8.8  | 8.4  | 13.8 | ---  | 0.7¶  |
| New Jersey    | 3.1  | 3.5  | 5.3  | 6.8  | 8.2  | 9.5  | 11.5 | 15.9 | 19.2 | 17.4 | 18.6 | 17.5 | 16.1 | 18.6 | 19.4 | ---  | 1.4¶  |
| New Mexico    | ---  | ---  | ---  | ---  | ---  | ---  | ---  | ---  | 15.4 | 19.1 | 20.8 | 26.2 | 25.7 | 27.1 | 29.2 | ---  | 2.3¶  |
| New York      | 3.6  | 4.7  | 6.6  | 8.6  | 10.0 | 11.4 | 12.7 | 13.7 | 15.6 | 15.8 | 18.4 | 20.1 | 19.3 | 20.1 | 22.5 | ---  | 1.4¶  |

Haight SC, Byatt N, Moore Simas TA, Robbins CL, Ko JY. Recorded diagnoses of depression during United States delivery hospitalizations, 2000–2015. *Obstet Gynecol* 2019;133.

The authors provided this information as a supplement to their article.

©2019 American College of Obstetricians and Gynecologists.

|                |     |      |      |      |      |      |      |      |      |      |      |      |      |      |      |      |                  |
|----------------|-----|------|------|------|------|------|------|------|------|------|------|------|------|------|------|------|------------------|
| North Carolina | 4.5 | 6.5  | 9.3  | 13.0 | 15.4 | 16.2 | 18.0 | 17.5 | 18.4 | 20.6 | 22.5 | 24.1 | 25.1 | 28.9 | 35.8 | 39.7 | 1.9 <sup>¶</sup> |
| Oregon         | 7.6 | 11.9 | 15.2 | 16.4 | 19.8 | 21.3 | 21.2 | 23.7 | 28.6 | 30.3 | 34.3 | 36.7 | 40.2 | 41.3 | 49.8 | ---  | 2.6 <sup>¶</sup> |
| Rhode Island   | --- | ---  | 25.9 | 25.4 | 30.7 | 34.5 | 32.3 | 33.4 | 34.6 | 31.7 | 37.5 | 49.1 | 40.7 | 38.4 | 45.3 | ---  | 1.5 <sup>¶</sup> |
| South Carolina | 3.6 | 4.6  | 7.2  | 9.5  | 11.3 | 11.7 | 11.6 | 12.4 | 16.5 | 20.3 | 25.0 | 26.2 | 25.9 | 28.2 | ---  | ---  | 1.8 <sup>¶</sup> |
| South Dakota   | --- | ---  | ---  | ---  | ---  | ---  | ---  | 20.3 | 21.3 | 28.7 | 28.8 | 32.3 | 34.3 | 38.7 | 43.4 | ---  | 3.2 <sup>¶</sup> |
| Utah           | 5.0 | 7.4  | 11.7 | 14.5 | 17.6 | 17.3 | 17.7 | 20.5 | 24.6 | 29.9 | 29.4 | 32.0 | 31.4 | 36.8 | 37.5 | ---  | 2.3 <sup>¶</sup> |
| Vermont        | --- | 8.8  | 8.8  | 11.6 | 18.6 | 26.4 | 31.6 | 48.7 | 43.3 | 47.5 | 56.4 | 52.1 | 56.4 | 75.4 | 76.3 | ---  | 5.3 <sup>¶</sup> |
| Washington     | 6.0 | 7.4  | 10.1 | 11.9 | 13.4 | 13.4 | 15.0 | 15.7 | 18.2 | 22.4 | 24.0 | 25.6 | 26.6 | 32.0 | 37.8 | ---  | 1.9 <sup>¶</sup> |
| West Virginia  | 5.1 | 8.0  | 8.9  | 11.4 | 13.8 | 16.7 | 19.7 | 21.5 | 19.2 | 20.9 | 22.4 | 20.7 | 26.3 | 28.7 | 31.6 | ---  | 1.7 <sup>¶</sup> |
| Wisconsin      | 7.6 | 9.9  | 13.2 | 18.9 | 23.4 | 26.1 | 29.0 | 32.5 | 33.8 | 35.3 | 40.0 | 41.8 | 39.2 | 43.4 | 49.3 | 52.0 | 3.0 <sup>¶</sup> |

--- Data not available

\*Prevalence rate numerator consisted of depressive disorder ICD-9-CM codes (291.89, 292.84, 293.83, 296.2-296.26, 296.3-296.36, 300.4, and 311), prevalence rate denominator consisted of delivery hospitalization discharges

<sup>†</sup>Rates are for 2000 through the third quarter of 2015.

<sup>‡</sup> Estimated average annual rate change

<sup>§</sup> Insufficient data (<3 years) to assess linear trend.

<sup>¶</sup> Trend significantly increasing at  $P < 0.05$ .
